# Supplementary material for: Database of global glendonite and ikaite records throughout the Phanerozoic
Source: Copernicus journal article supplement (doi:10.5194/essd-13-343-2021), 2021-02-11
Supplement: Supplementary file 1 [file essd-13-343-2021-supplement.pdf]

Supplement of Earth Syst. Sci. Data, 13, 343–356, 2021  
<https://doi.org/10.5194/essd-13-343-2021-supplement>  
© Author(s) 2021. This work is distributed under  
the Creative Commons Attribution 4.0 License.

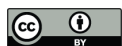

Open Access  
Earth System  
Science  
Data

*Supplement of*

## **Database of global glendonite and ikaite records throughout the Phanerozoic**

**Mikhail Rogov et al.**

*Correspondence to:* Mikhail Rogov ([russianjurassic@gmail.com](mailto:russianjurassic@gmail.com))

The copyright of individual parts of the supplement might differ from the CC BY 4.0 License.

# Supplementary

## List of terms used in online search for glendonites

- Anthraconite (Anthrakonit, антраконит). This term is also frequently using for any black limestone bands or concretions (see Berg-Madsen, 1989 for review), but in some cases (i.e. Early Paleozoic of Estonia and Saint-Petersburg area) this term
- 5 was applied solely for glendonites for ~ 150 years (Hausmann, 1806: introduction of the term ‘Anthraconite’ for black limestones; Karpinsky, 1887: first usage of this term for Ordovician glendonites)
- Barleycorn
- Fundylite (Steacy, Grant, 1974)
- Gaylussite (гейлюссит)
- 10 Gennoishi (玄能石, геннойши) (Ko, 1896)
- Gerstenkörner
- Glendonite (глендонит) (David et al., 1905)
- Hedgehogs (Fricker, 1963)
- Hokou-seki (方孔石)
- 15 Ikaite (Pauly, 1963)
- Jarrowite (Browell, 1863)
- Polar euhedrons (Kemper, Schmitz, 1975)
- Pseudogaylussite (псевдогейлюссит) (van Calker, 1897)
- Stellate (calcareous) concretions (звездчатые конкреции)
- 20 Thinolite (King, 1878)
- Беломорские рогульки (White sea hornlets: Jeremejew, 1882), беломорское ископаемое (White sea fossil: Sokolov, 1825)

## List of online search engines and alerts used for data collecting in this study

- 25 <http://google.com> (mainly with search for pdfs, by using Boolean search filetype:pdf)
- <http://books.google.com> (search through different books and periodicals, including those which available in snippet view mode only)
- <http://scholar.google.com> (search through papers and set up alerts for new publications containing words ‘glendonite’ and/or ‘ikaite’)
- 30 <http://scopus.com> (search through papers and set up alerts for new publications containing words ‘glendonite’ and/or ‘ikaite’)
- <http://app.dimensions.ai> (keyword search)

<http://apps.webofknowledge.com> (keyword search)

<https://ci.nii.ac.jp/en/> ; <https://www.jstage.jst.go.jp/> (search for Japanese papers)

35 <http://archive.org> (full-text keyword search)

<http://gallica.bnf.fr> (full-text keyword search)

## References

- 40 Berg-Madsen, V.: Origin and usage of the geological terms orsten, stinkstone, and anthraconite, *Arch. Nat. Hist.*, 16(2), 191–208, doi:10.3366/anh.1989.16.2.191, 1989.
- Browell, E. J. J.: Description and analysis of an undescribed mineral from Jarrow Slake, *Transactions of the Tyneside Naturalists Field Club*, 5, 103–104, 1863.
- van Calker, F. V.: Beitrag zur Kenntnis des Pseudogaylussit, und über dessen Vorkommen in Holland, *Zeitschrift für Krystallographie, Mineralogie und Geologie*, 28(6), 556–572, doi: 10.1524/zkri.1897.28.1.556, 1897.
- 45 David, T. W. E., Taylor, T. G., Woolnough, W. G. and Foxall, H. G.: Occurrence of the pseudomorph glendonites in New South Wales, *Records of the Geological Survey of New South Wales*, 8, 162–179, 1905.
- Fricker, P.E.: Geology of the expedition area. Western Central Axel Heiberg Island, Canadian Arctic Archipelago. Axel Heiberg Island research report. McGill University, Montreal. Jacobsen-McGill Arctic Research Expedition 1959-1962. *Geology*, No. 1, 156 pp., 1963.
- 50 Hausmann, J. F. L.: Correspondenz-Nachrichten, *Efemeriden der Berg- und Hüttenkunde*, 2, 303–305, 1806.
- Jeremejew, P.: Die pseudomorphen Krystalle des Aragonite and des Eisen-oxydes ans den russischen Fundorten, *Verhandlungen der Russisch-kaiserlichen mineralogischen Gesellschaft zu St. Petersburg*, 2(17), 319–336, 1882. (in Russian)
- Karpinsky, A.: Ueber die cambrische, silurische und einige andere Ablagerungen in Gouvernement Pskow, *Mining journal (Gorny zhurnal)*, 2, 261–270, 1887. (in Russian)
- Kemper, E. and Schmitz, H. H.: Stellate nodules from the upper Deer Bay formation (Valanginian) of Arctic Canada, *Geological Survey of Canada Paper*, 75, 109–119, doi: 10.4095/103040, 1975.
- King, C.: Report of the Geological Exploration of the Fortieth Parallel, Volume I: Systematic Geology, *Professional papers of the Engineer department US army*, 761 pp., 1878.
- 60 Ko, S.: Mineral localities in Chiisagata, Shinano, *Jour. Geol. Soc. Japan*, 3(34), 321–323, doi:10.5575/geosoc.3.34\_321, 1896.
- Pauly, H.: “Ikaite”, a new mineral from Greenland, *Arctic*, 16(4), 263–264, doi: 10.14430/arctic3545, 1963.
- Sokolov, D.: On White Sea mineral, *Mining journal (Gorny zhurnal)*, 6, 117–120, 1825. (in Russian)

Steady, H. R. and Grant, D. R.: Tidal muds reveal mineral curiosity, *Can. Geogr.*, 88(1), 36–38, 1974.
